# Supplementary material for: Drug-Induced Immune Thrombocytopenia Toxicity Prediction Based on Machine Learning
Source: MDPI journal article supplement (doi:10.3390/pharmaceutics14050943), 2022-04-26
Supplement: s1 [file s1]

# **Drug-induced immune thrombocytopenia toxicity prediction based on machine learning**

## **SUPPLEMENTARY INFORMATION**

*Binyou Wang*<sup>1, †</sup>, *Xiaoqiu Tan*<sup>2,3,4,†</sup>, *Jianmin Guo*<sup>2</sup>, *Ting Xiao*<sup>2</sup>, *Yan Jiao*<sup>5</sup>, *Junlin Zhao*<sup>1</sup>, *Jianming Wu*<sup>6,7,\*</sup>, *Yiwei Wang*<sup>2,3,4,\*</sup>

<sup>1</sup>School of Pharmacy, Southwest Medical University, Luzhou, 646000, China.

<sup>2</sup>School of Basic Medical Science, Southwest Medical University, Luzhou, 646000, China.

<sup>3</sup>Key Laboratory of Medical Electrophysiology, Southwest Medical University, Luzhou 646000, China.

<sup>4</sup>Ministry of Education & Medical Electrophysiological Key Laboratory of Sichuan Province, Institute of Cardiovascular Research, Southwest Medical University, Luzhou 646000, China.

<sup>5</sup>State Key Laboratory of Biotherapy and Cancer Center, West China Hospital, Sichuan University, Chengdu 610041, China.

<sup>6</sup>Sichuan Key Medical Laboratory of New Drug Discovery and Druggability Evaluation; School of Pharmacy, Southwest Medical University, Luzhou, 646000 China.

<sup>7</sup>Luzhou Key Laboratory of Activity Screening and Druggability Evaluation for Chinese Materia Medica, School of Pharmacy, Southwest Medical University, Luzhou, 646000 China.

† These authors contributed equally to this work.

\* Corresponding authors: Yiwei Wang, Jianming Wu

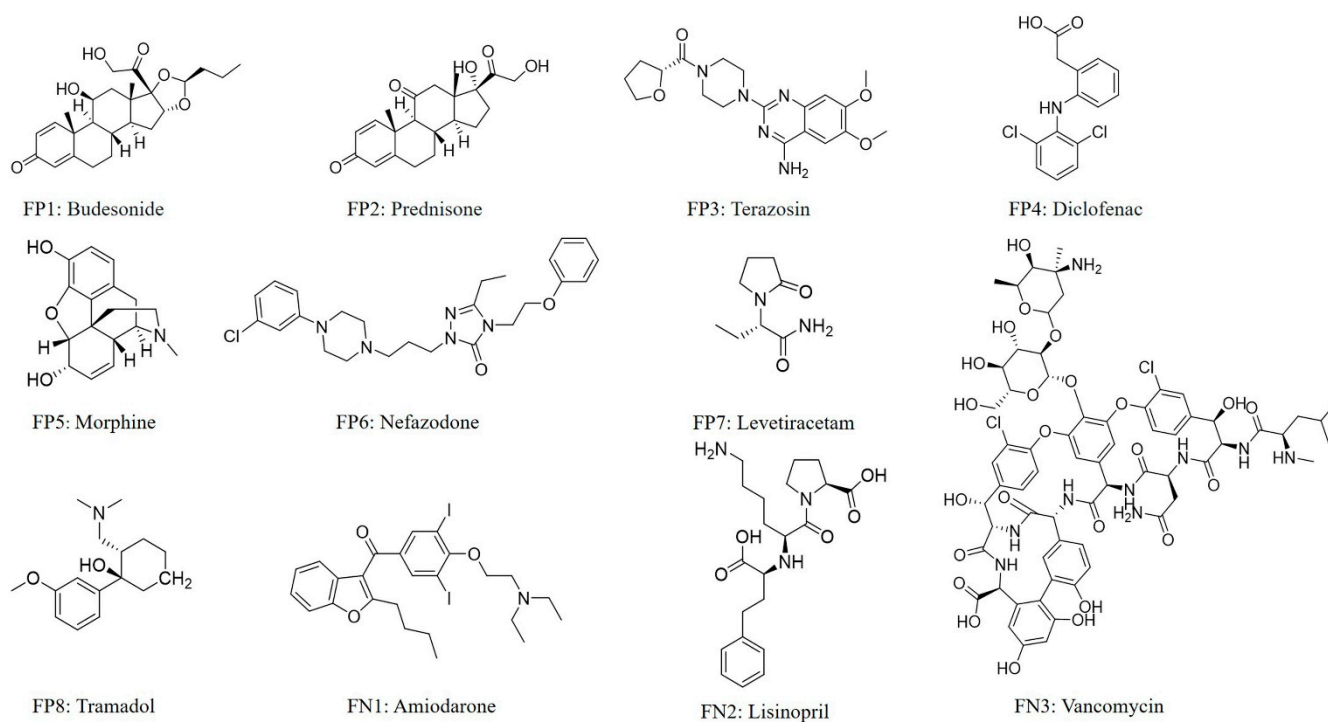

**Figure S1.** Misclassified compounds of the RDMD+PubChem-k-NN model on the external validation set.

**Table S1.** Details of the training set and external validation set compounds.

| Training set   |       |                                                                                                                                                                                                                                                                                                                                                                             |
|----------------|-------|-----------------------------------------------------------------------------------------------------------------------------------------------------------------------------------------------------------------------------------------------------------------------------------------------------------------------------------------------------------------------------|
| Name           | Class | SMILES                                                                                                                                                                                                                                                                                                                                                                      |
| ACETAMINOPHEN  | 1     | <chem>CC(=O)NC1=CC=C(O)C=C1</chem>                                                                                                                                                                                                                                                                                                                                          |
| ACYCLOVIR      | 0     | <chem>NC1=NC(=O)C2=C(N1)N(COCCO)C=N2</chem>                                                                                                                                                                                                                                                                                                                                 |
| ALBUTEROL      | 0     | <chem>CC(C)(C)NCC(O)C1=CC(CO)=C(O)C=C1</chem>                                                                                                                                                                                                                                                                                                                               |
| ALENDRONATE    | 0     | <chem>NCCCC(O)(P(O)(O)=O)P(O)(O)=O</chem>                                                                                                                                                                                                                                                                                                                                   |
| ALLOPURINOL    | 0     | <chem>OC1=NC=NC2=C1C=NN2</chem>                                                                                                                                                                                                                                                                                                                                             |
| ALPRAZOLAM     | 0     | <chem>CC1=NN=C2CN=C(C3=CC=CC=C3)C3=C(C=CC(Cl)=C3)N12</chem>                                                                                                                                                                                                                                                                                                                 |
| AMITRIPTYLINE  | 1     | <chem>CN(C)CCC=C1C2=CC=CC=C2CCC2=CC=CC=C12</chem>                                                                                                                                                                                                                                                                                                                           |
| AMLODIPINE     | 0     | <chem>CCOC(=O)C1=C(COCCN)NC(C)=C(C1C1=CC=CC=C1Cl)C(=O)OC</chem>                                                                                                                                                                                                                                                                                                             |
| AMOXICILLIN    | 1     | <chem>[H][C@]12SC(C)(C)[C@@H](N1C(=O)[C@H]2NC(=O)[C@H](N)C1=CC=C(O)C=C1)C(O)=O</chem>                                                                                                                                                                                                                                                                                       |
| AMPHOTERICIN B | 0     | <chem>[H][C@]12C[C@@H](O[C@@H]3O[C@H](C)[C@@H](O)[C@H](N)[C@@H]3O)\C=C\C=C\C=C\C=C\C=C\C=C\C=C[C@H](C)[C@@H](O)[C@@H](C)[C@H](C)OC(=O)C[C@H](O)C[C@H](O)CC[C@@H](O)[C@H](O)C[C@H](O)C[C@](O)(C[C@H](O)[C@H]1C(O)=O)O2</chem>                                                                                                                                                |
| AMPICILLIN     | 1     | <chem>[H][C@]12SC(C)(C)[C@@H](N1C(=O)[C@H]2NC(=O)[C@H](N)C1=CC=CC=C1)C(O)=O</chem>                                                                                                                                                                                                                                                                                          |
| ARGATROBAN     | 1     | <chem>C[C@@H]1CCN([C@H](C1)C(O)=O)C(=O)[C@H](CCNC(N)=N)NS(=O)(=O)C1=CC=CC2=C1NCC(C)C2</chem>                                                                                                                                                                                                                                                                                |
| ASPIRIN        | 1     | <chem>CC(=O)OC1=CC=CC=C1C(O)=O</chem>                                                                                                                                                                                                                                                                                                                                       |
| ATORVASTATIN   | 0     | <chem>CC(C)C1=C(C(=O)NC2=CC=CC=C2)C(=C(N1CC[C@@H](O)C[C@@H](O)CC(O)=O)C1=C(C=C(F)C=C1)C1=CC=CC=C1</chem>                                                                                                                                                                                                                                                                    |
| AZACITIDINE    | 1     | <chem>NC1=NC(=O)N(C=N1)[C@@H]1O[C@H](CO)[C@@H](O)[C@H]1O</chem>                                                                                                                                                                                                                                                                                                             |
| BENZTROPINE    | 0     | <chem>[H][C@]12CC[C@]([H])(C[C@@]([H])(C1)OC(C1=CC=CC=C1)C1=CC=CC=C1)N2C</chem>                                                                                                                                                                                                                                                                                             |
| BIVALIRUDIN    | 0     | <chem>CC[C@H](C)[C@H](NC(=O)[C@H](CCC(O)=O)NC(=O)[C@H](CCC(O)=O)NC(=O)[C@H](CC1=CC=CC=C1)NC(=O)[C@H](CC(O)=O)NC(=O)CNC(=O)[C@H](CC(N)=O)NC(=O)CNC(=O)CNC(=O)CNC(=O)[C@@H]1CCCN1C(=O)[C@H](CCCNC(N)=N)NC(=O)[C@@H]1CCCN1C(=O)[C@H](N)CC1=CC=CC=C1)C(=O)N1CCC[C@H]1C(=O)N[C@@H](CCC(O)=O)C(=O)N[C@@H](CCC(O)=O)C(=O)N[C@@H](CC1=CC=C(O)C=C1)C(=O)N[C@@H](CC(C)C)C(O)=O</chem> |

|                       |   |                                                                                                                                                                                                                                           |
|-----------------------|---|-------------------------------------------------------------------------------------------------------------------------------------------------------------------------------------------------------------------------------------------|
| BUPROPION             | 1 | <chem>CC(NC(C)(C)C)C(=O)C1=CC(Cl)=CC=C1</chem>                                                                                                                                                                                            |
| BUSPIRONE             | 0 | <chem>O=C1CC2(CCCC2)CC(=O)N1CCCCN1CCN(CC1)C1=NC=CC=N1</chem>                                                                                                                                                                              |
| CAPTOPRIL             | 0 | <chem>C[C@H](CS)C(=O)N1CCC[C@H]1C(O)=O</chem>                                                                                                                                                                                             |
| CARBAMAZEPINE         | 1 | <chem>NC(=O)N1C2=CC=CC=C2C=CC2=CC=CC=C12</chem>                                                                                                                                                                                           |
| CARBIDOPA             | 0 | <chem>C[C@@](CC1=CC(O)=C(O)C=C1)(NN)C(O)=O</chem>                                                                                                                                                                                         |
| CARVEDILOL            | 0 | <chem>COC1=CC=CC=C1OCCNCC(O)COC1=CC=CC2=C1C1=CC=CC=C1N2</chem>                                                                                                                                                                            |
| CASPOFUNGIN           | 0 | <chem>[H][C@@]12C[C@@H](O)CN1C(=O)[C@@H](NC(=O)[C@]([H])(C[C@@H](O)[C@@H](NCCN)NC(=O)[C@@H]1[C@@H](O)CCN1C(=O)[C@@H](NC(=O)[C@@H](NC2=O)[C@H](O)[C@@H](O)C1=CC=C(O)C=C1)[C@H](O)CCN)NC(=O)CCCCCCCC[C@@H](C)C[C@@H](C)CC)[C@@H](C)O</chem> |
| CEFADROXIL            | 1 | <chem>[H][C@]12SCC(C)=C(N1C(=O)[C@H]2NC(=O)[C@H](N)C1=CC=C(O)C=C1)C(O)=O</chem>                                                                                                                                                           |
| CEFEPIME              | 1 | <chem>C[N+]1(CCCC1)CC2=C(N3[C@@H]([C@@H](C3=O)NC(=O)/C(=N/OC)/C4=CSC(=N4)N)SC2)C(=O)[O-]</chem>                                                                                                                                           |
| CEFPODOXIME           | 1 | <chem>[H][C@]12SCC(COC)=C(N1C(=O)[C@H]2NC(=O)C(=N/OC)\C1=CSC(N)=N1)C(O)=O</chem>                                                                                                                                                          |
| CEFTIZOXIME           | 1 | <chem>CO/N=C\C(=O)N[C@@H]1C(=O)N2C(C(=O)O)=C(CSc3nc(=O)c(O)nn3C)CS[C@H]12)c1csc(N)n1</chem>                                                                                                                                               |
| CEFTRIAZONE           | 1 | <chem>[H][C@]12SCC(CSC3=NC(=O)C(=O)NN3C)=C(N1C(=O)[C@H]2NC(=O)C(=N/OC)\C1=CSC(N)=N1)C(O)=O</chem>                                                                                                                                         |
| CEFUROXIME            | 0 | <chem>[H][C@]12SCC(COC(N)=O)=C(N1C(=O)[C@H]2NC(=O)C(=N/OC)\C1=CC=CO1)C(O)=O</chem>                                                                                                                                                        |
| CELECOXIB             | 1 | <chem>CC1=CC=C(C=C1)C1=CC(=NN1C1=CC=C(C=C1)S(N)(=O)=O)C(F)(F)F</chem>                                                                                                                                                                     |
| CEPHALEXIN            | 1 | <chem>[H][C@]12SCC(C)=C(N1C(=O)[C@H]2NC(=O)[C@H](N)C1=CC=CC=C1)C(O)=O</chem>                                                                                                                                                              |
| CHLORPROMAZINE        | 0 | <chem>CN(C)CCCN1C2=CC=CC=C2SC2=C1C=C(Cl)C=C2</chem>                                                                                                                                                                                       |
| CIMETIDINE            | 0 | <chem>CN\C(NCCSCC1=C(C)NC=N1)=N\C#N</chem>                                                                                                                                                                                                |
| CIPROFLOXACIN         | 1 | <chem>OC(=O)C1=CN(C2CC2)C2=CC(N3CCNCC3)=C(F)C=C2C1=O</chem>                                                                                                                                                                               |
| CITALOPRAM            | 0 | <chem>CN(C)CCCC1(OCC2=C1C=CC(=C2)C#N)C1=CC=C(F)C=C1</chem>                                                                                                                                                                                |
| CLARITHROMYCIN        | 0 | <chem>[H][C@@]1(C[C@@](C)(OC)[C@@H](O)[C@H](C)O1)O[C@H]1[C@H](C)[C@@H](O[C@]2([H])O[C@H](C)C[C@@H]([C@H]2O)N(C)C)[C@@](C)(C[C@@H](C)C(=O)[C@H](C)[C@@H](O)[C@](C)(O)[C@@H](CC)OC(=O)[C@@H]1C)OC</chem>                                    |
| CLAVULANATE POTASSIUM | 0 | <chem>O=C([C@@H]/C(O[C@]1([H])C2=C/C/O)N1C2=O)O[K]</chem>                                                                                                                                                                                 |

|                 |   |                                                                                                                                                                                                                                                                                            |
|-----------------|---|--------------------------------------------------------------------------------------------------------------------------------------------------------------------------------------------------------------------------------------------------------------------------------------------|
| CLINDAMYCIN     | 1 | <chem>[H][C@@](NC(=O)[C@@H]1C[C@@H](CCC)CN1C)([C@H](C)Cl)[C@@]1([H])O[C@H](SC)[C@H](O)[C@@H](O)[C@H]1O</chem>                                                                                                                                                                              |
| CLONIDINE       | 0 | <chem>ClC1=CC=CC(Cl)=C1NC1=NCCN1</chem>                                                                                                                                                                                                                                                    |
| CLOPIDOGREL     | 0 | <chem>[H][C@@](N1CCC2=C(C1)C=CS2)(C(=O)OC)C1=CC=CC=C1Cl</chem>                                                                                                                                                                                                                             |
| COLCHICINE      | 0 | <chem>COC1=CC2=C(C(OC)=C1OC)C1=CC=C(OC)C(=O)C=C1C(CC2)NC(C)=O</chem>                                                                                                                                                                                                                       |
| CYCLOSPORINE    | 1 | <chem>CC[C@@H]1NC(=O)[C@H]([C@H](O)[C@H](C)C\C=C\C)N(C)C(=O)[C@H](C(C)C)N(C)C(=O)[C@H](CC(C)C)N(C)C(=O)[C@H](CC(C)C)N(C)C(=O)[C@@H](C)NC(=O)[C@H](C)NC(=O)[C@H](CC(C)C)N(C)C(=O)[C@@H](NC(=O)[C@H](CC(C)C)N(C)C(=O)CN(C)C1=O)C(C)C</chem>                                                  |
| DAPSONE         | 0 | <chem>NC1=CC=C(C=C1)S(=O)(=O)C1=CC=C(N)C=C1</chem>                                                                                                                                                                                                                                         |
| DAPTOMYCIN      | 1 | <chem>CCCCCCCCC(=O)N[C@@H](CC1=CNC2=C1C=CC=C2)C(=O)N[C@H](CC(N)=O)C(=O)N[C@@H](CC(O)=O)C(=O)N[C@H]1[C@@H](C)OC(=O)[C@H](CC(=O)C2=CC=CC=C2N)NC(=O)[C@@H](NC(=O)[C@@H](CO)NC(=O)CNC(=O)[C@H](CC(O)=O)NC(=O)[C@@H](C)NC(=O)[C@H](CC(O)=O)NC(=O)[C@H](CCCN)NC(=O)CNC1=O)[C@H](C)CC(O)=O</chem> |
| DEXAMETHASONE   | 1 | <chem>[H][C@@]12C[C@@H](C)[C@](O)(C(=O)CO)[C@@]1(C)C[C@H](O)[C@@]1(F)[C@@]2([H])CCC2=CC(=O)C=C[C@]12C</chem>                                                                                                                                                                               |
| DIAZEPAM        | 0 | <chem>CN1C2=C(C=C(Cl)C=C2)C(=NCC1=O)C1=CC=CC=C1</chem>                                                                                                                                                                                                                                     |
| DIGOXIN         | 0 | <chem>[H][C@]12CC[C@]3([H])[C@]([H])(C[C@@H](O)[C@]4(C)[C@H](CC[C@]34O)C3=CC(=O)OC3)[C@@]1(C)CC[C@@H](C2)O[C@H]1C[C@H](O)[C@H](O[C@H]2C[C@H](O)[C@H](O[C@H]3C[C@H](O)[C@H](O)[C@@H](C)O3)[C@@H](C)O2)[C@@H](C)O1</chem>                                                                    |
| DILTIAZEM       | 0 | <chem>COC1=CC=C(C=C1)[C@@H]1SC2=C(C=CC=C2)N(CCN(C)C)C(=O)[C@@H]1OC(C)=O</chem>                                                                                                                                                                                                             |
| DIPHENHYDRAMINE | 1 | <chem>CN(C)CCOC(C1=CC=CC=C1)C1=CC=CC=C1</chem>                                                                                                                                                                                                                                             |
| DOBUTAMINE      | 1 | <chem>CC(CCC1=CC=C(O)C=C1)NCCC1=CC(O)=C(O)C=C1</chem>                                                                                                                                                                                                                                      |
| DOCUSATE        | 0 | <chem>CCCCC(CC)COC(=O)CC(C(=O)OCC(CC)CCCC)S(O)(=O)=O</chem>                                                                                                                                                                                                                                |
| DONEPEZIL       | 0 | <chem>COC1=C(OC)C=C2C(=O)C(CC3CCN(CC4=CC=CC=C4)CC3)CC2=C1</chem>                                                                                                                                                                                                                           |
| DOPAMINE        | 0 | <chem>NCCC1=CC(O)=C(O)C=C1</chem>                                                                                                                                                                                                                                                          |
| DOXAZOSIN       | 0 | <chem>COC1=C(OC)C=C2C(N)=NC(=NC2=C1)N1CCN(CC1)C(=O)C1COC2=CC=CC=C2O1</chem>                                                                                                                                                                                                                |
| DOXYCYCLINE     | 1 | <chem>[H][C@@]12[C@@H](C)C3=CC=CC(O)=C3C(=O)C1=C(O)[C@]1(O)C(=O)C(C(N)=O)=C(O)[C@@H](N(C)C)[C@]1([H])[C@H]2O</chem>                                                                                                                                                                        |
| ENALAPRIL       | 0 | <chem>CCOC(=O)[C@H](CCC1=CC=CC=C1)N[C@@H](C)C(=O)N1CCC[C@H]1C(O)=O</chem>                                                                                                                                                                                                                  |
| ESCITALOPRAM    | 0 | <chem>CN(C)CCC[C@]1(OCC2=C1C=CC(=C2)C#N)C1=CC=C(F)C=C1</chem>                                                                                                                                                                                                                              |

|                     |   |                                                                                                       |
|---------------------|---|-------------------------------------------------------------------------------------------------------|
| ESOMEPRAZOLE        | 1 | <chem>COC1=CC2=C(NC(=N2)[S@@](=O)CC2=NC=C(C)C(OC)=C2C)C=C1</chem>                                     |
| ETHAMBUTOL          | 1 | <chem>CC[C@@H](CO)NCCN[C@@H](CC)CO</chem>                                                             |
| ETHOXISUXIMIDE      | 1 | <chem>O=C(C(C)(CC)C1)NC1=O</chem>                                                                     |
| EZETIMIBE           | 0 | <chem>[H][C@]1(CC[C@H](O)C2=CC=C(F)C=C2)C(=O)N(C2=CC=C(F)C=C2)[C@]1([H])C1=CC=C(O)C=C1</chem>         |
| FAMOTIDINE          | 0 | <chem>NC(N)=NC1=NC(CSCCC(N)=NS(N)(=O)=O)=CS1</chem>                                                   |
| FELBAMATE           | 1 | <chem>NC(=O)OCC(COC(N)=O)C1=CC=CC=C1</chem>                                                           |
| FELODIPINE          | 1 | <chem>CCOC(=O)C1=C(C)NC(C)=C(C1C1=C(Cl)C(Cl)=CC=C1)C(=O)OC</chem>                                     |
| FENOFIBRATE         | 0 | <chem>CC(C)OC(=O)C(C)(C)OC1=CC=C(C=C1)C(=O)C1=CC=C(Cl)C=C1</chem>                                     |
| FENTANYL            | 1 | <chem>CCC(=O)N(C1CCN(CCC2=CC=CC=C2)CC1)C1=CC=CC=C1</chem>                                             |
| FEXOFENADINE        | 1 | <chem>CC(C)(C(O)=O)C1=CC=C(C=C1)C(O)CCCN1CCC(CC1)C(O)(C1=CC=CC=C1)C1=CC=CC=C1</chem>                  |
| FLUCONAZOLE         | 0 | <chem>OC(CN1C=NC=N1)(CN1C=NC=N1)C1=C(F)C=C(F)C=C1</chem>                                              |
| FLUOROURACIL        | 0 | <chem>FC1=CNC(=O)NC1=O</chem>                                                                         |
| FLUOXETINE          | 0 | <chem>CNCCC(OC1=CC=C(C=C1)C(F)(F)F)C1=CC=CC=C1</chem>                                                 |
| FOSINOPRIL          | 0 | <chem>CCC(=O)O[C@@H](OP(=O)(CCCCC1=CC=CC=C1)CC(=O)N1C[C@@H](C[C@H]1C(O)=O)C1CCCCC1)C(C)C</chem>       |
| FUROSEMIDE          | 1 | <chem>NS(=O)(=O)C1=C(Cl)C=C(NCC2=CC=CO2)C(=C1)C(O)=O</chem>                                           |
| GABAPENTIN          | 0 | <chem>NCC1(CC(O)=O)CCCCC1</chem>                                                                      |
| GLIMEPIRIDE         | 0 | <chem>CCC1=C(C)CN(C(=O)NCCC2=CC=C(C=C2)S(=O)(=O)NC(=O)N[C@H]2CC[C@H](C)CC2)C1=O</chem>                |
| GLYBURIDE           | 0 | <chem>COC1=C(C=C(Cl)C=C1)C(=O)NCCC1=CC=C(C=C1)S(=O)(=O)NC(=O)NC1CCCCC1</chem>                         |
| HYDRALAZINE         | 0 | <chem>NNC1=NN=CC2=CC=CC=C12</chem>                                                                    |
| HYDROCHLOROTHIAZIDE | 0 | <chem>NS(=O)(=O)C1=C(Cl)C=C2NCNS(=O)(=O)C2=C1</chem>                                                  |
| HYDROCORTISONE      | 0 | <chem>[H][C@@]12CC[C@](O)(C(=O)CO)[C@@]1(C)C[C@H](O)[C@@]1([H])[C@@]2([H])CCC2=CC(=O)CC[C@]12C</chem> |
| HYDROXYCHLOROQUINE  | 1 | <chem>CCN(CCO)CCCC(C)NC1=C2C=CC(Cl)=CC2=NC=C1</chem>                                                  |

|               |   |                                                                                                          |
|---------------|---|----------------------------------------------------------------------------------------------------------|
| IBRUTINIB     | 1 | <chem>NC1=NC=NC2=C1C(=NN2[C@@H]1CCCN(C1)C(=O)C=C)C1=CC=C(OC2=CC=CC=C2)C=C1</chem>                        |
| IRBESARTAN    | 0 | <chem>CCCCC1=NC2(CCCC2)C(=O)N1CC1=CC=C(C=C1)C1=CC=CC=C1C1=NNN=N1</chem>                                  |
| IRINOTECAN    | 1 | <chem>CCC1=C2CN3C(=CC4=C(COC(=O)[C@]4(O)CC)C3=O)C2=NC2=CC=C(OC(=O)N3CCC(CC3)N3CCCCC3)C=C12</chem>        |
| ISONIAZID     | 0 | <chem>NNC(=O)C1=CC=NC=C1</chem>                                                                          |
| ISOSORBIDE    | 0 | <chem>[H][C@]1(O)CO[C@]2([H])[C@]([H])(O)CO[C@]12[H]</chem>                                              |
| ISOTRETINOIN  | 0 | <chem>C\C(C=C\C1=C(C)CCCC1(C)C)=C/C=C/C(/C)=C\C(O)=O</chem>                                              |
| LABETALOL     | 0 | <chem>CC(CCC1=CC=CC=C1)NCC(O)C1=CC(C(N)=O)=C(O)C=C1</chem>                                               |
| LAMOTRIGINE   | 1 | <chem>NC1=NC(N)=C(N=N1)C1=C(Cl)C(Cl)=CC=C1</chem>                                                        |
| LANSOPRAZOLE  | 1 | <chem>CC1=C(OCC(F)(F)F)C=CN=C1CS(=O)C1=NC2=CC=CC=C2N1</chem>                                             |
| LEUCOVORIN    | 1 | <chem>[H]C(=O)N1C(CNC2=CC=C(C=C2)C(=O)N[C@@H](CCC(O)=O)C(O)=O)CNC2=C1C(=O)NC(N)=N2</chem>                |
| LEVOFLOXACIN  | 1 | <chem>C[C@H]1COC2=C3N1C=C(C(O)=O)C(=O)C3=CC(F)=C2N1CCN(C)CC1</chem>                                      |
| LEVOTHYROXINE | 0 | <chem>N[C@@H](CC1=CC(I)=C(OC2=CC(I)=C(O)C(I)=C2)C(I)=C1)C(O)=O</chem>                                    |
| LIDOCAINE     | 0 | <chem>CCN(CC)CC(=O)NC1=C(C)C=CC=C1C</chem>                                                               |
| LINEZOLID     | 0 | <chem>CC(=O)NC[C@H]1CN(C(=O)O1)C1=CC(F)=C(C=C1)N1CCOCC1</chem>                                           |
| LOPERAMIDE    | 0 | <chem>CN(C)C(=O)C(CCN1CCC(O)(CC1)C1=CC=C(Cl)C=C1)(C1=CC=CC=C1)C1=CC=CC=C1</chem>                         |
| LORATADINE    | 0 | <chem>CCOC(=O)N1CCC(CC1)=C1C2=C(CCC3=C1N=CC=C3)C=C(Cl)C=C2</chem>                                        |
| LORAZEPAM     | 1 | <chem>OC1N=C(C2=CC=CC=C2Cl)C2=C(NC1=O)C=CC(Cl)=C2</chem>                                                 |
| LOSARTAN      | 1 | <chem>CCCCC1=NC(Cl)=C(CO)N1CC1=CC=C(C=C1)C1=CC=CC=C1C1=NNN=N1</chem>                                     |
| LOVASTATIN    | 0 | <chem>[H][C@]12[C@H](C[C@@H](C)C=C1C=C[C@H](C)[C@@H]2CC[C@@H]1C[C@@H](O)C(=O)O1)OC(=O)[C@@H](C)CC</chem> |
| MEFLOQUINE    | 0 | <chem>OC(C1CCCCN1)C1=CC(=NC2=C1C=CC=C2C(F)(F)F)C(F)(F)F</chem>                                           |
| MEROPENEM     | 0 | <chem>[H][C@]1([C@@H](C)O)C(=O)N2C(C(O)=O)=C(S[C@@H]3CN[C@@H](C3)C(=O)N(C)C)[C@H](C)[C@]12[H]</chem>     |
| METFORMIN     | 0 | <chem>CN(C)C(=N)NC(N)=N</chem>                                                                           |
| METHOTREXATE  | 0 | <chem>[H][C@@](CCC(O)=O)(NC(=O)C1=CC=C(C=C1)N(C)CC1=NC2=C(N)NC(=N)N=C2N=C1)C(O)=O</chem>                 |

|                 |   |                                                                                                                                                                              |
|-----------------|---|------------------------------------------------------------------------------------------------------------------------------------------------------------------------------|
| METHYLPHENIDATE | 0 | <chem>COC(=O)C(C1CCCCN1)C1=CC=CC=C1</chem>                                                                                                                                   |
| METOCLOPRAMIDE  | 0 | <chem>CCN(CC)CCNC(=O)C1=CC(Cl)=C(N)C=C1OC</chem>                                                                                                                             |
| METOPROLOL      | 0 | <chem>COCCC1=CC=C(OCC(O)CNC(C)C)C=C1</chem>                                                                                                                                  |
| METRONIDAZOLE   | 1 | <chem>CC1=NC=C(N1CCO)[N+][O-]=O</chem>                                                                                                                                       |
| MIDAZOLAM       | 0 | <chem>CC1=NC=C2CN=C(C3=CC=CC=C3F)C3=C(C=CC(Cl)=C3)N12</chem>                                                                                                                 |
| MILRINONE       | 0 | <chem>CC1=C(C=C(C#N)C(=O)N1)C1=CC=NC=C1</chem>                                                                                                                               |
| MINOCYCLINE     | 0 | <chem>[H][C@@]12CC3=C(C(O)=CC=C3N(C)C)C(=O)C1=C(O)[C@]1(O)C(=O)C(C(N)=O)=C(O)[C@@H](N(C)C)[C@]1([H])C2</chem>                                                                |
| MINOXIDIL       | 0 | <chem>NC1=CC(=NC(N)=[N+][O-])N1CCCCC1</chem>                                                                                                                                 |
| MIRTAZAPINE     | 0 | <chem>CN1CCN2C(C1)C1=CC=CC=C1CC1=C2N=CC=C1</chem>                                                                                                                            |
| MONTELUKAST     | 0 | <chem>OC(=O)CC1(CC1)CS[C@H](CCC1=CC=CC=C1C(O)(C)C)C1=CC=CC(\C=C\C2=NC3=C(C=CC(Cl)=C3)C=C2)=C1</chem>                                                                         |
| MOXIFLOXACIN    | 0 | <chem>[H][C@]12CN(C[C@@]1([H])NCCC2)C1=C(F)C=C2C(=O)C(=CN(C3CC3)C2=C1OC)C(O)=O</chem>                                                                                        |
| MYCOPHENOLATE   | 0 | <chem>COC1=C(C\C=C(/C)CCC(O)=O)C(O)=C2C(=O)OCC2=C1C</chem>                                                                                                                   |
| NAFCILLIN       | 1 | <chem>[H][C@]12SC(C)(C)[C@@H](N1C(=O)[C@H]2NC(=O)C1=C(OCC)C=CC2=CC=CC=C12)C(O)=O</chem>                                                                                      |
| NAPROXEN        | 1 | <chem>COC1=CC2=C(C=C1)C=C(C=C2)[C@H](C)C(O)=O</chem>                                                                                                                         |
| NIFEDIPINE      | 0 | <chem>COC(=O)C1=C(C)NC(C)=C(C1C1=CC=CC=C1[N+][O-])C(=O)OC</chem>                                                                                                             |
| NITROFURANTOIN  | 1 | <chem>C1C(=O)NC(=O)N1/N=C/C2=CC=C(O2)[N+](=O)[O-]</chem>                                                                                                                     |
| NITROGLYCERIN   | 0 | <chem>[O-][N+](=O)OCC(CO[N+][O-])O[N+][O-]</chem>                                                                                                                            |
| NIZATIDINE      | 1 | <chem>CNC(NCCSCC1=CSC(CN(C)C)=N1)=C[N+][O-]</chem>                                                                                                                           |
| NOREPINEPHRINE  | 0 | <chem>NC[C@H](O)C1=CC(O)=C(O)C=C1</chem>                                                                                                                                     |
| NYSTATIN        | 0 | <chem>C[C@H]1/C=C/C=CC/C=C/C=C/C=C/C=C/C(CC2C(C(C[C@](O2)(CC(C(CCC(CC(CC(CC(=O)O[C@H]([C@@H]([C@@H]1O)C)C)O)O)O)O)O)C(=O)O)[C@@H]3[C@H]([C@H]([C@@H]([C@H](O3)C)O)N)O</chem> |
| OLANZAPINE      | 1 | <chem>CN1CCN(CC1)C1=NC2=CC=CC=C2NC2=C1C=C(C)S2</chem>                                                                                                                        |
| OLMESARTAN      | 1 | <chem>CCCC1=NC(=C(N1CC1=CC=C(C=C1)C1=C(C=CC=C1)C1=NN=NN1)C(O)=O)C(C)(C)O</chem>                                                                                              |
| OMEPRAZOLE      | 0 | <chem>COC1=CC2=C(C=C1)N=C(N2)S(=O)CC1=NC=C(C)C(OC)=C1C</chem>                                                                                                                |



|                  |   |                                                                                                                                                                                      |
|------------------|---|--------------------------------------------------------------------------------------------------------------------------------------------------------------------------------------|
| ONDANSETRON      | 1 | <chem>CN1C2=C(C3=CC=CC=C13)C(=O)C(CN1C=CN=C1C)CC2</chem>                                                                                                                             |
| OXACILLIN        | 0 | <chem>[H][C@]12SC(C)(C)[C@@H](N1C(=O)[C@H]2NC(=O)C1=C(C)ON=C1C1=CC=CC=C1)C(O)=O</chem>                                                                                               |
| OXALIPLATIN      | 1 | <chem>C1CC[C@H]([C@@H](C1)[NH-])[NH-].C(=O)(C(=O)[O-])[O-].[Pt+4]</chem>                                                                                                             |
| OXAPROZIN        | 1 | <chem>OC(=O)CCC1=NC(=C(O1)C1=CC=CC=C1)C1=CC=CC=C1</chem>                                                                                                                             |
| OXYCODONE        | 0 | <chem>COC1=C2O[C@H]3C(=O)CC[C@@]4(O)[C@H]5CC(C=C1)=C2[C@@]34CCN5C</chem>                                                                                                             |
| PAPAVERINE       | 1 | <chem>COC1=C(OC)C=C(CC2=NC=CC3=CC(OC)=C(OC)C=C23)C=C1</chem>                                                                                                                         |
| PAROXETINE       | 1 | <chem>FC1=CC=C(C=C1)[C@@H]1CCNC[C@H]1COC1=CC2=C(OCO2)C=C1</chem>                                                                                                                     |
| PENICILLIN       | 0 | <chem>[H][C@]12SC(C)(C)[C@@H](N1C(=O)[C@H]2NC(=O)CC1=CC=CC=C1)C(O)=O</chem>                                                                                                          |
| PHENOBARBITAL    | 1 | <chem>CCC1(C(=O)NC(=O)NC1=O)C1=CC=CC=C1</chem>                                                                                                                                       |
| PIOGLITAZONE     | 0 | <chem>CCC1=CN=C(CCOC2=CC=C(CC3SC(=O)NC3=O)C=C2)C=C1</chem>                                                                                                                           |
| PIPERACILLIN     | 1 | <chem>[H][C@]12SC(C)(C)[C@@H](N1C(=O)[C@H]2NC(=O)[C@H](NC(=O)N1CCN(CC)C(=O)C1=O)C1=CC=CC=C1)C(O)=O</chem>                                                                            |
| PREGABALIN       | 0 | <chem>CC(C)C[C@H](CN)CC(O)=O</chem>                                                                                                                                                  |
| PROPRANOLOL      | 1 | <chem>CC(C)NCC(O)COC1=CC=CC2=C1C=CC=C2</chem>                                                                                                                                        |
| PROPYLTHIOURACIL | 1 | <chem>CCCC1=CC(=O)NC(=S)N1</chem>                                                                                                                                                    |
| QUETIAPINE       | 1 | <chem>OCCOCCN1CCN(CC1)C1=NC2=CC=CC=C2SC2=CC=CC=C12</chem>                                                                                                                            |
| QUINAPRIL        | 0 | <chem>CCOC(=O)[C@H](CCC1=CC=CC=C1)N[C@@H](C)C(=O)N1CC2=CC=CC=C2C[C@H]1C(O)=O</chem>                                                                                                  |
| QUININE          | 1 | <chem>[H][C@]1(C[C@@H]2CC[N@]1C[C@@H]2C=C)[C@H](O)C1=CC=NC2=CC=C(OC)C=C12</chem>                                                                                                     |
| RABEPRAZOLE      | 0 | <chem>COCCOC1=C(C)C(CS(=O)C2=NC3=CC=CC=C3N2)=NC=C1</chem>                                                                                                                            |
| RALOXIFENE       | 0 | <chem>OC1=CC=C(C=C1)C1=C(C(=O)C2=CC=C(OCCN3CCCCC3)C=C2)C2=C(S1)C=C(O)C=C2</chem>                                                                                                     |
| RAMIPRIL         | 0 | <chem>[H][C@@]12CCC[C@]1([H])N([C@@H](C2)C(O)=O)C(=O)[C@H](C)N[C@@H](CCC1=CC=CC=C1)C(=O)OCC</chem>                                                                                   |
| RANITIDINE       | 1 | <chem>CNC(NCCSCC1=CC=C(CN(C)C)O1)=C[N+](O-)=O</chem>                                                                                                                                 |
| RIFABUTIN        | 0 | <chem>CO[C@H]1\C=C\C\O[C@@]2(C)OC3=C(C2=O)C2=C(C(O)=C3C)C(=O)C(NC(=O)\C(C)=C/C=C/[C@H](C)[C@H](O)[C@@H](C)[C@H](O)[C@@H](C)[C@H](OC(C)=O)[C@@H]1C)=C1NC3(CCN(CC3)CC(C)C)N=C21</chem> |

|                |   |                                                                                                                                                                                                                                                         |
|----------------|---|---------------------------------------------------------------------------------------------------------------------------------------------------------------------------------------------------------------------------------------------------------|
| RIFAMPIN       | 1 | <chem>C[C@H]1/C=C/C=C(\C(=O)NC2=C(C(=C3C(=C2O)C(=C(C4=C3C(=O)[C@](O4)(O/C=C/[C@@H]([C@H]([C@H]([C@@H]([C@@H]([C@@H]([C@H]1O)C)O)C)OC(=O)C)C)OC)C)C)O)O)/C=N/N5CCN(CC5)C)/C</chem>                                                                       |
| RIFAXIM        | 1 | <chem>O=C1C2=C(O[C@@]1(O/C=C/[C@@H]([C@H]([C@H]([C@@H]([C@@H]([C@@H]([C@H](O)[C@@H](C)/C=C/C=C(C)\C3=O)C)O)C)OC(C)=O)C)OC)C)C(C)=C(O)C4=C2C5=C(C(N3)=C4O)N6C(C=C(C)C=C6)=N5</chem>                                                                      |
| RISPERIDONE    | 0 | <chem>CC1=C(CCN2CCC(CC2)C2=NOC3=C2C=CC(F)=C3)C(=O)N2CCCCC2=N1</chem>                                                                                                                                                                                    |
| ROSUVASTATIN   | 0 | <chem>CC(C)C1=NC(=NC(C2=CC=C(F)C=C2)=C1\C=C\[C@@H](O)C[C@@H](O)CC(=O)O)N(C)S(C)(=O)=O</chem>                                                                                                                                                            |
| SERTRALINE     | 1 | <chem>CN[C@H]1CC[C@@H](C2=CC(Cl)=C(Cl)C=C2)C2=CC=CC=C12</chem>                                                                                                                                                                                          |
| SILDENAFIL     | 0 | <chem>CCCC1=NN(C)C2=C1N=C(NC2=O)C1=CC(=CC=C1OCC)S(=O)(=O)N1CCN(C)CC1</chem>                                                                                                                                                                             |
| SIMVASTATIN    | 1 | <chem>[H][C@]12[C@H](C[C@@H](C)C=C1C=C[C@H](C)[C@@H]2CC[C@@H]1C[C@@H](O)C(C(=O)O1)OC(=O)C(C)(C)CC</chem>                                                                                                                                                |
| SOTALOL        | 0 | <chem>CC(C)NCC(O)C1=CC=C(NS(C)(=O)=O)C=C1</chem>                                                                                                                                                                                                        |
| SPIRONOLACTONE | 1 | <chem>[H][C@@]12CC[C@@]3(CCC(=O)O3)[C@@]1(C)CC[C@@]1([H])[C@@]2([H])[C@@]([H])(CC2=CC(=O)CC[C@]12C)SC(C)=O</chem>                                                                                                                                       |
| SUCRALFATE     | 0 | <chem>O.O[Al](O)O.O[Al](O)OS(=O)(=O)OC[C@H]1O[C@@](COS(=O)(=O)O[Al](O)O)(O[C@H]2O[C@H](COS(=O)(=O)O[Al](O)O)[C@@H](OS(=O)(=O)O[Al](O)O)[C@H](OS(=O)(=O)O[Al](O)O)[C@H]2OS(=O)(=O)O[Al](O)O)[C@@H](OS(=O)(=O)O[Al](O)O)[C@@H]1OS(=O)(=O)O[Al](O)O</chem> |
| SULFISOXAZOLE  | 1 | <chem>CC1=NOC(NS(=O)(=O)C2=CC=C(N)C=C2)=C1C</chem>                                                                                                                                                                                                      |
| SURAMIN        | 1 | <chem>CC1=C(NC(=O)C2=CC(NC(=O)NC3=CC=CC(=C3)C(=O)NC3=C(C)C=CC(=C3)C(=O)NC3=C4C(C=C(C=C4S(O)(=O)=O)S(O)(=O)=O)=C(C=C3)S(O)(=O)=O)=CC=C2)C=C(C=C1)C(=O)NC1=C2C(C=C(C=C2S(O)(=O)=O)S(O)(=O)=O)=C(C=C1)S(O)(=O)=O</chem>                                    |
| TACROLIMUS     | 1 | <chem>CO[C@@H]1C[C@@H](CC[C@H]1O)\C=C(/C)[C@H]1OC(=O)[C@@H]2CCCCN2C(=O)C(=O)[C@]2(O)O[C@@H]([C@H](C[C@H]2C)OC)[C@H](C[C@@H](C)C\C(C)=C[C@@H](CC=C)C(=O)C[C@H](O)[C@H]1C)OC</chem>                                                                       |
| TAMOXIFEN      | 0 | <chem>CC\C(=C(/C1=CC=CC=C1)C1=CC=C(OCCN(C)C)C=C1)C1=CC=CC=C1</chem>                                                                                                                                                                                     |
| TAMSULOSIN     | 0 | <chem>CCOC1=CC=CC=C1OCCN[C@H](C)CC1=CC(=C(OC)C=C1)S(N)(=O)=O</chem>                                                                                                                                                                                     |

|                |   |                                                                                                                                  |
|----------------|---|----------------------------------------------------------------------------------------------------------------------------------|
| TETRACYCLINE   | 0 | <chem>[H][C@@]12C[C@@]3([H])C(=C(O)[C@]1(O)C(=O)C(C(N)=O)=C(O)[C@H]2N(C)C)C(=O)C1=C(O)C=CC=C1[C@@]3(C)O</chem>                   |
| TIROFIBAN      | 1 | <chem>CCCCS(=O)(=O)N[C@@H](CC1=CC=C(OC2CCCC2CCNCC2)C=C1)C(O)=O</chem>                                                            |
| TOBRAMYCIN     | 0 | <chem>NC[C@H]1O[C@H](O[C@@H]2[C@@H](N)C[C@@H](N)[C@H](O[C@H]3O[C@H](CO)[C@@H](O)[C@H](N)[C@H]3O)[C@H]2O)[C@H](N)C[C@@H]1O</chem> |
| TOLTERODINE    | 0 | <chem>CC(C)N(CC[C@H](C1=CC=CC=C1)C1=C(O)C=CC(C)=C1)C(C)C</chem>                                                                  |
| TOPIRAMATE     | 0 | <chem>[H][C@@]12CO[C@@]3(COS(N)(=O)=O)OC(C)(C)O[C@@]3([H])[C@]1([H])OC(C)(C)O2</chem>                                            |
| TRAZODONE      | 1 | <chem>ClC1=CC=CC(=C1)N1CCN(CCCN2N=C3C=CC=CN3C2=O)CC1</chem>                                                                      |
| TRIAMTERENE    | 0 | <chem>NC1=NC(N)=C2N=C(C(N)=NC2=N1)C1=CC=CC=C1</chem>                                                                             |
| TRIAZOLAM      | 0 | <chem>CC1=NN=C2CN=C(C3=CC=CC=C3Cl)C3=C(C=CC(Cl)=C3)N12</chem>                                                                    |
| TRIMETHOPRIM   | 1 | <chem>COC1=CC(CC2=CN=C(N)N=C2N)=CC(OC)=C1OC</chem>                                                                               |
| URSODIOL       | 0 | <chem>C[C@H](CCC(O)=O)[C@H]1CC[C@@]2([H])[C@]3([H])[C@@H](O)C[C@]4([H])C[C@H](O)CC[C@]4(C)[C@@]3([H])CC[C@]12C</chem>            |
| VALACYCLOVIR   | 0 | <chem>CC(C)[C@H](N)C(=O)OCCOCN1C=NC2=C1NC(N)=NC2=O</chem>                                                                        |
| VALGANCICLOVIR | 0 | <chem>CC(C)[C@H](N)C(=O)OCC(CO)OCN1C=NC2=C1NC(N)=NC2=O</chem>                                                                    |
| VALPROIC ACID  | 1 | <chem>CCCC(CCC)C(O)=O</chem>                                                                                                     |
| VERAPAMIL      | 1 | <chem>COC1=C(OC)C=C(CCN(C)CCCC(C#N)(C(C)C)C2=CC(OC)=C(OC)C=C2)C=C1</chem>                                                        |
| VORICONAZOLE   | 1 | <chem>C[C@@H](C1=NC=NC=C1F)[C@](O)(CN1C=NC=N1)C1=C(F)C=C(F)C=C1</chem>                                                           |
| WARFARIN       | 0 | <chem>CC(=O)CC(C1=CC=CC=C1)C1=C(O)C2=C(OC1=O)C=CC=C2</chem>                                                                      |
| ZOLMITRIPTAN   | 1 | <chem>CN(C)CCC1=CNC2=CC=C(C[C@H]3COC(=O)N3)C=C12</chem>                                                                          |

| External validation set |       |                                                                                                                                                                  |
|-------------------------|-------|------------------------------------------------------------------------------------------------------------------------------------------------------------------|
| Name                    | Class | SMILES                                                                                                                                                           |
| AMIODARONE              | 1     | <chem>CCCCC1=C(C(=O)C2=CC(I)=C(OCN(CC)CC)C(I)=C2)C2=C(O1)C=CC=C2</chem>                                                                                          |
| ATENOLOL                | 1     | <chem>CC(C)NCC(O)COC1=CC=C(CC(N)=O)C=C1</chem>                                                                                                                   |
| ATOVAQUONE              | 0     | <chem>OC1=C([C@H]2CC[C@@H](CC2)C2=CC=C(Cl)C=C2)C(=O)C2=CC=CC=C2C1=O</chem><br><chem>CC[C@H]1OC(=O)[C@H](C)[C@@H](O[C@H]2C[C@@](C)(OC)[C@@H](O)[C@H](C)O2)</chem> |
| AZITHROMYCIN            | 0     | <chem>[C@H](C)[C@@H](O[C@@H]2O[C@H](C)C[C@@H]([C@H]2O)N(C)C)[C@](C)(O)C[C@@H](C)CN(C)[C@H](C)[C@@H](O)[C@]1(C)O</chem>                                           |

|                    |   |                                                                                                                    |
|--------------------|---|--------------------------------------------------------------------------------------------------------------------|
| AZTREONAM          | 1 | <chem>C[C@H]1[C@H](NC(=O)C(=N/OC(C)(C)C(=O)O)\C2=CSC([NH3+])=N2)C(=O)N1S([O-])(=O)=O</chem>                        |
| BENAZEPRIL         | 0 | <chem>[H][C@@]1(CCC2=CC=CC=C2N(CC(O)=O)C1=O)N[C@@H](CCC1=CC=CC=C1)C(=O)OC</chem>                                   |
| BUDESONIDE         | 0 | <chem>[H][C@@]12C[C@H]3OC(CCC)O[C@@]3(C(=O)CO)[C@@]1(C)C[C@H](O)[C@@]1([H])[C@@]2([H])CCC2=CC(=O)C=C[C@]12C</chem> |
| BUMETANIDE         | 1 | <chem>CCCCNC1=C(OC2=CC=CC=C2)C(=CC(=C1)C(O)=O)S(N)(=O)=O</chem>                                                    |
| CEFAZOLIN          | 1 | <chem>[H][C@]12SCC(CSC3=NN=C(C)S3)=C(N1C(=O)[C@H]2NC(=O)CN1C=NN=N1)C(O)=O</chem>                                   |
| CEFTAZIDIME        | 1 | <chem>[O-]C(=O)C1=C(CS[C@]2([H])[C@H](NC(=O)C(=N/OC(C)(C)C(O)=O)\C3=CSC(N)=N3)C(=O)N12)C[N+]1=CC=CC=C1</chem>      |
| CILASTATIN         | 0 | <chem>CC1(C)C[C@@H]1C(=O)N\C(=C/CCCCSC[C@H](N)C(O)=O)C(O)=O</chem>                                                 |
| CLONAZEPAM         | 0 | <chem>[O-][N+](=O)C1=CC2=C(NC(=O)CN=C2C2=CC=CC=C2Cl)C=C1</chem>                                                    |
| DICLOFENAC         | 0 | <chem>OC(=O)CC1=CC=CC=C1NC1=C(Cl)C=CC=C1Cl</chem>                                                                  |
| FINASTERIDE        | 0 | <chem>[H][C@@]12CC[C@H](C(=O)NC(C)(C)C)[C@@]1(C)CC[C@@]1([H])[C@@]2([H])CC[C@@]2([H])NC(=O)C=C[C@]12C</chem>       |
| FLUVASTATIN        | 0 | <chem>CC(C)N1C(\C=C\[C@H](O)C[C@H](O)CC(O)=O)=C(C2=CC=C(F)C=C2)C2=CC=CC=C12</chem>                                 |
| GENTAMICIN         | 0 | <chem>CNC(C)C1CCC(N)C(OC2C(N)CC(N)C(OC3OCC(C)(O)C(NC)C3O)C2O)O1</chem>                                             |
| GLIPIZIDE          | 0 | <chem>CC1=NC=C(N=C1)C(=O)NCCC1=CC=C(C=C1)S(=O)(=O)NC(=O)NC1CCCCC1</chem>                                           |
| HALOPERIDOL        | 1 | <chem>OC1(CCN(CCCC(=O)C2=CC=C(F)C=C2)CC1)C1=CC=C(Cl)C=C1</chem>                                                    |
| HYDROMORPHONE      | 0 | <chem>[H][C@@]12OC3=C(O)C=CC4=C3[C@@]11CCN(C)[C@]([H])(C4)[C@]1([H])CCC2=O</chem>                                  |
| IBUPROFEN          | 1 | <chem>CC(C)CC1=CC=C(C=C1)C(C)C(O)=O</chem>                                                                         |
| IPRATROPIUM        | 0 | <chem>[H][C@]12CC[C@]([H])(C[C@@H](C1)OC(=O)C(CO)C1=CC=CC=C1)[N+]2(C)C(C)C</chem>                                  |
| LEVETIRACETAM      | 0 | <chem>CC[C@H](N1CCCC1=O)C(N)=O</chem>                                                                              |
| LISINOPRIL         | 1 | <chem>NCCCC[C@H](N[C@@H](CCC1=CC=CC=C1)C(O)=O)C(=O)N1CCC[C@H]1C(O)=O</chem>                                        |
| LORACARBEF         | 1 | <chem>N[C@@H](C(=O)N[C@H]1[C@H]2CCC(Cl)=C(N2C1=O)C(O)=O)C1=CC=CC=C1</chem>                                         |
| MELOXICAM          | 0 | <chem>CN1C(C(=O)NC2=NC=C(C)S2)=C(O)C2=C(C=CC=C2)S1(=O)=O</chem>                                                    |
| METHYLDOPA         | 0 | <chem>C[C@](N)(CC1=CC=C(O)C(O)=C1)C(O)=O</chem>                                                                    |
| METHYLPREDNISOLONE | 1 | <chem>[H][C@@]12CC[C@](O)(C(=O)CO)[C@@]1(C)C[C@H](O)[C@@]1([H])[C@@]2([H])C[C@H](C)C2=CC(=O)C=C[C@]12C</chem>      |

|                 |   |                                                                                                                                                                                                                                            |
|-----------------|---|--------------------------------------------------------------------------------------------------------------------------------------------------------------------------------------------------------------------------------------------|
| METOLAZONE      | 0 | <chem>CC1NC2=CC(Cl)=C(C=C2C(=O)N1C1=CC=CC=C1C)S(N)(=O)=O</chem>                                                                                                                                                                            |
| MORPHINE        | 0 | <chem>[H][C@@]12OC3=C(O)C=CC4=C3[C@@]11CCN(C)[C@]([H])(C4)[C@]1([H])C=C[C@@H]2O</chem>                                                                                                                                                     |
| NEFAZODONE      | 0 | <chem>CCC1=NN(CCCN2CCN(CC2)C2=CC(Cl)=CC=C2)C(=O)N1CCOC1=CC=CC=C1</chem>                                                                                                                                                                    |
| OXCARBAZEPINE   | 1 | <chem>NC(=O)N1C2=CC=CC=C2CC(=O)C2=C1C=CC=C2</chem>                                                                                                                                                                                         |
| PANTOPRAZOLE    | 1 | <chem>COC1=C(OC)C(CS(=O)C2=NC3=C(N2)C=C(OC(F)F)C=C3)=NC=C1</chem>                                                                                                                                                                          |
| PHENYTOIN       | 1 | <chem>O=C1NC(=O)C(N1)(C1=CC=CC=C1)C1=CC=CC=C1</chem>                                                                                                                                                                                       |
| PRAVASTATIN     | 0 | <chem>[H][C@]12[C@H](C[C@H](O)C=C1C=C[C@H](C)[C@@H]2CC[C@@H](O)C[C@@H](O)C(C(O)=O)OC(=O)[C@@H](C)CC</chem>                                                                                                                                 |
| PREDNISONE      | 0 | <chem>[H][C@@]12CC[C@](O)(C(=O)CO)[C@@]1(C)CC(=O)[C@@]1([H])[C@@]2([H])CCC2=C(C(=O)C=C[C@]12C</chem>                                                                                                                                       |
| PROCAINAMIDE    | 1 | <chem>CCN(CC)CCNC(=O)C1=CC=C(N)C=C1</chem>                                                                                                                                                                                                 |
| PROPOXYPHENE    | 1 | <chem>CCC(=O)O[C@@](CC1=CC=CC=C1)([C@H](C)CN(C)C)C1=CC=CC=C1</chem>                                                                                                                                                                        |
| QUINIDINE       | 1 | <chem>[H][C@@]12CCN(C[C@@H]1C=C)[C@]([H])(C2)[C@@H](O)C1=C2C=C(OC)C=CC2=NC=C1</chem>                                                                                                                                                       |
| RISEDRONIC ACID | 0 | <chem>OC(CC1=CN=CC=C1)(P(O)(O)=O)P(O)(O)=O</chem>                                                                                                                                                                                          |
| TERAZOSIN       | 0 | <chem>COC1=C(OC)C=C2C(N)=NC(=NC2=C1)N1CCN(CC1)C(=O)C1CCCCO1</chem>                                                                                                                                                                         |
| TRAMADOL        | 0 | <chem>COC1=CC=CC(=C1)[C@@]1(O)CCCC[C@@H]1CN(C)C</chem>                                                                                                                                                                                     |
| VALSARTAN       | 0 | <chem>CCCCC(=O)N(CC1=CC=C(C=C1)C1=CC=CC=C1C1=NNN=N1)[C@@H](C(C)C)C(O)=O</chem><br><chem>CN[C@H](CC(C)C)C(=O)N[C@@H]1[C@H](O)C2=CC=C(OC3=C(O[C@@H]4O[C@H](CO)[C@@H](O)[C@H](O)[C@H]4O[C@H]4C[C@](C)(N)[C@H](O)[C@H](C)O4)C4=CC(=C3))</chem> |
| VANCOMYCIN      | 1 | <chem>[C@@H](NC(=O)[C@H](CC(N)=O)NC1=O)C(=O)N[C@@H]1C3=CC(=C(O)C=C3)C3=C(O)C=C(O)C=C3[C@H](NC(=O)[C@@H](NC1=O)[C@H](O)C1=CC(Cl)=C(O4)C=C1)C(O)=O</chem><br><chem>C(Cl)=C2</chem>                                                           |
| VENLAFAXINE     | 0 | <chem>COC1=CC=C(C=C1)C(CN(C)C)C1(O)CCCCC1</chem>                                                                                                                                                                                           |
| ZOLPIDEM        | 0 | <chem>CN(C)C(=O)CC1=C(N=C2C=CC(C)=CN12)C1=CC=C(C)C=C1</chem>                                                                                                                                                                               |

---

**Table S2.** Summary of the six types of molecular fingerprints used.

| <b>Fingerprints type</b> | <b>Abbreviation</b> | <b>Pattern type</b> | <b>Bit size</b> |
|--------------------------|---------------------|---------------------|-----------------|
| MACCS                    | MACCS               | Structural features | 166             |
| Atom Pairs 2D            | AP2D                | Structural features | 780             |
| PubChem                  | PubChem             | Structural features | 881             |
| Klekota-Roth             | KRFP                | Structural features | 4860            |
| CDK                      | CDK                 | Hash fingerprints   | 1024            |
| CDK Extended             | ExtFP               | Hash fingerprints   | 1024            |

**Table S3.** Hyperparameters of the machine learning-based models.

| Method   | Hyperparameter                           | Value                        |
|----------|------------------------------------------|------------------------------|
| SVM      | penalty parameter $C$                    | {0.5, 0.6, 0.7, 0.8, 0.9, 1} |
| RF       | number of estimators                     | {10, 50, 100}                |
|          | max features                             | {auto, sqrt, log2, 0.5}      |
| k-NN     | number of neighbors                      | {2–10}                       |
| ANN      | hidden layer size                        | {10, 50, 100}                |
| Adaboost | number of estimators                     | {10, 50, 100}                |
| XGboost  | maximum tree depth                       | {3, 5, 8, 10}                |
|          | minimum sum of instance weights in child | {1, 3, 5}                    |

**Table S4.** Prediction results of the optimal classification models on training set by using the five-fold cross-validation.

| Methods | Molecular features | SE           | SP          | ACC         | MCC         | AUC          |
|---------|--------------------|--------------|-------------|-------------|-------------|--------------|
| SVM     | RDKit+MACCS        | 0.537±0.034  | 0.646±0.026 | 0.580±0.013 | 0.185±0.028 | 0.591±0.014  |
|         | RDKit+CDK          | 0.550±0.023  | 0.649±0.023 | 0.590±0.014 | 0.205±0.026 | 0.599±0.012  |
|         | RDKit+PubChem      | 0.515±0.025  | 0.584±0.035 | 0.537±0.011 | 0.101±0.029 | 0.549±0.014  |
|         | RDKit+KRFP         | 0.690±0.027  | 0.508±0.025 | 0.590±0.016 | 0.205±0.029 | 0.599±0.014  |
|         | RDKit+AP2D         | 0.530±0.026  | 0.607±0.031 | 0.558±0.014 | 0.139±0.021 | 0.569±0.010  |
|         | RDKit+ExtFP        | 0.577±0.022  | 0.629±0.036 | 0.590±0.022 | 0.210±0.028 | 0.603±0.014  |
|         | 10md+MACCS         | 0.571±0.020  | 0.512±0.033 | 0.527±0.019 | 0.085±0.037 | 0.541±0.018  |
|         | 10md+CDK           | 0.539±0.035  | 0.659±0.024 | 0.587±0.014 | 0.206±0.026 | 0.599±0.0120 |
|         | 10md+PubChem       | 0.564±0.032  | 0.575±0.032 | 0.559±0.014 | 0.141±0.021 | 0.569±0.011  |
|         | 10md+KRFP          | 0.572±0.019  | 0.636±0.021 | 0.589±0.010 | 0.212±0.023 | 0.604±0.010  |
|         | 10md+AP2D          | 0.571±0.045  | 0.533±0.042 | 0.532±0.021 | 0.110±0.038 | 0.552±0.019  |
|         | 10md+ExtFP         | 0.579±0.028  | 0.629±0.036 | 0.588±0.018 | 0.215±0.030 | 0.604±0.015  |
|         | CC+MACCS           | 0.544±0.032  | 0.654±0.033 | 0.590±0.015 | 0.199±0.030 | 0.599±0.015  |
|         | CC+CDK             | 0.514±0.023  | 0.697±0.034 | 0.591±0.018 | 0.222±0.022 | 0.605±0.010  |
|         | CC+PubChem         | 0.561±0.030  | 0.596±0.032 | 0.568±0.020 | 0.162±0.030 | 0.578±0.014  |
|         | CC+KRFP            | 0.582±0.036  | 0.625±0.044 | 0.589±0.014 | 0.210±0.026 | 0.603±0.013  |
|         | CC+AP2D            | 0.440±0.017  | 0.692±0.019 | 0.555±0.020 | 0.137±0.034 | 0.566±0.016  |
|         | CC+ExtFP           | 0.550±0.029  | 0.664±0.026 | 0.602±0.017 | 0.218±0.029 | 0.607±0.015  |
| k-NN    | RDKit+MACCS        | 0.464±0.020  | 0.731±0.025 | 0.592±0.015 | 0.206±0.031 | 0.597±0.015  |
|         | RDKit+CDK          | 0.485±0.023  | 0.711±0.017 | 0.594±0.014 | 0.203±0.028 | 0.598±0.014  |
|         | RDKit+PubChem      | 0.690±0.023  | 0.566±0.021 | 0.627±0.010 | 0.261±0.022 | 0.628±0.011  |
|         | RDKit+KRFP         | 0.651±0.022  | 0.474±0.039 | 0.557±0.021 | 0.128±0.038 | 0.563±0.018  |
|         | RDKit+AP2D         | 0.634±0.044  | 0.539±0.031 | 0.585±0.019 | 0.175±0.040 | 0.586±0.019  |
|         | RDKit+ExtFP        | 0.487±0.021  | 0.692±0.009 | 0.583±0.017 | 0.183±0.027 | 0.590±0.012  |
|         | 10md+MACCS         | 0.435± 0.023 | 0.749±0.029 | 0.584±0.011 | 0.195±0.025 | 0.592±0.011  |
|         | 10md+CDK           | 0.481±0.015  | 0.718±0.031 | 0.596±0.008 | 0.207±0.021 | 0.600±0.010  |



|    |               |              |             |             |             |              |
|----|---------------|--------------|-------------|-------------|-------------|--------------|
| NB | 10md+PubChem  | 0.669±0.020  | 0.572±0.024 | 0.618±0.017 | 0.243±0.031 | 0.621±0.016  |
|    | 10md+KRFP     | 0.646±0.026  | 0.509±0.044 | 0.574±0.013 | 0.158±0.028 | 0.578±0.015  |
|    | 10md+AP2D     | 0.435±0.023  | 0.763±0.021 | 0.597±0.015 | 0.213±0.032 | 0.599±0.015  |
|    | 10md+ExtFP    | 0.500±0.027  | 0.696±0.027 | 0.597±0.015 | 0.199±0.035 | 0.598±0.016  |
|    | CC+MACCS      | 0.626±0.032  | 0.571±0.028 | 0.599±0.016 | 0.198±0.037 | 0.598±0.019  |
|    | CC+CDK        | 0.481±0.027  | 0.706±0.027 | 0.592±0.018 | 0.192±0.041 | 0.593±0.020  |
|    | CC+PubChem    | 0.655±0.020  | 0.565±0.024 | 0.608±0.014 | 0.222±0.027 | 0.610±0.013  |
|    | CC+KRFP       | 0.466±0.021  | 0.737±0.011 | 0.598±0.008 | 0.215±0.021 | 0.601±0.009  |
|    | CC+AP2D       | 0.646±0.023  | 0.564±0.020 | 0.603±0.012 | 0.211±0.024 | 0.605±0.013  |
|    | CC+ExtFP      | 0.489±0.025  | 0.711±0.023 | 0.593±0.017 | 0.207±0.024 | 0.600±0.013  |
|    | RDKit+MACCS   | 0.506±0.022  | 0.610±0.047 | 0.558±0.020 | 0.117±0.039 | 0.558±0.019  |
|    | RDKit+CDK     | 0.520±0.016  | 0.624±0.024 | 0.566±0.014 | 0.145±0.026 | 0.572±0.013  |
|    | RDKit+PubChem | 0.541±0.037  | 0.505±0.035 | 0.523±0.013 | 0.047±0.024 | 0.523±0.012  |
|    | RDKit+KRFP    | 0.604±0.030  | 0.567±0.026 | 0.571±0.021 | 0.174±0.027 | 0.585±0.014  |
|    | RDKit+AP2D    | 0.544±0.031  | 0.475±0.041 | 0.505±0.018 | 0.018±0.031 | 0.509±0.015  |
|    | RDKit+ExtFP   | 0.521±0.042  | 0.587±0.023 | 0.551±0.021 | 0.109±0.040 | 0.554±0.020  |
|    | 10md+MACCS    | 0.477±0.023  | 0.565±0.030 | 0.519±0.013 | 0.042±0.022 | 0.521± 0.011 |
|    | 10md+CDK      | 0.526± 0.028 | 0.592±0.020 | 0.558±0.008 | 0.118±0.018 | 0.559± 0.009 |
|    | 10md+PubChem  | 0.559±0.033  | 0.493±0.024 | 0.524±0.017 | 0.053±0.031 | 0.526±0.015  |
|    | 10md+KRFP     | 0.565±0.031  | 0.635±0.017 | 0.589±0.014 | 0.204±0.019 | 0.600±0.009  |
|    | 10md+AP2D     | 0.613±0.030  | 0.421±0.035 | 0.499±0.015 | 0.037±0.036 | 0.517±0.017  |
|    | 10md+ExtFP    | 0.487±0.021  | 0.593±0.024 | 0.537±0.018 | 0.081±0.025 | 0.540±0.012  |
|    | CC+MACCS      | 0.434±0.017  | 0.588±0.028 | 0.504±0.014 | 0.021±0.038 | 0.511±0.018  |
|    | CC+CDK        | 0.526±0.029  | 0.577±0.028 | 0.550±0.016 | 0.103±0.038 | 0.551±0.019  |
|    | CC+PubChem    | 0.558±0.032  | 0.525±0.020 | 0.535±0.020 | 0.083±0.020 | 0.541±0.010  |
|    | CC+KRFP       | 0.557±0.028  | 0.627±0.029 | 0.583±0.008 | 0.188±0.032 | 0.592±0.015  |
|    | CC+AP2D       | 0.494±0.018  | 0.593±0.014 | 0.537±0.008 | 0.088±0.017 | 0.543±0.008  |
|    | CC+ExtFP      | 0.493±0.030  | 0.596±0.026 | 0.545±0.011 | 0.090±0.030 | 0.545±0.014  |

|          |               |             |             |             |             |             |
|----------|---------------|-------------|-------------|-------------|-------------|-------------|
| AdaBoost | RDKit+MACCS   | 0.611±0.044 | 0.529±0.047 | 0.566±0.012 | 0.144±0.034 | 0.570±0.016 |
|          | RDKit+CDK     | 0.594±0.039 | 0.593±0.035 | 0.590±0.014 | 0.189±0.025 | 0.594±0.013 |
|          | RDKit+PubChem | 0.539±0.042 | 0.614±0.046 | 0.570±0.009 | 0.156±0.020 | 0.576±0.010 |
|          | RDKit+KRFP    | 0.541±0.031 | 0.654±0.031 | 0.593±0.013 | 0.197±0.026 | 0.598±0.013 |
|          | RDKit+AP2D    | 0.572±0.030 | 0.576±0.024 | 0.568±0.015 | 0.148±0.023 | 0.574±0.010 |
|          | RDKit+ExtFP   | 0.557±0.031 | 0.619±0.031 | 0.580±0.015 | 0.180±0.029 | 0.588±0.014 |
|          | 10md+MACCS    | 0.559±0.014 | 0.568±0.025 | 0.559±0.015 | 0.127±0.024 | 0.563±0.012 |
|          | 10md+CDK      | 0.602±0.027 | 0.588±0.025 | 0.588±0.014 | 0.190±0.039 | 0.595±0.019 |
|          | 10md+PubChem  | 0.586±0.027 | 0.558±0.028 | 0.566±0.011 | 0.145±0.019 | 0.572±0.009 |
|          | 10md+KRFP     | 0.574±0.042 | 0.628±0.029 | 0.599±0.014 | 0.206±0.023 | 0.601±0.012 |
|          | 10md+AP2D     | 0.601±0.033 | 0.601±0.043 | 0.594±0.008 | 0.205±0.025 | 0.601±0.013 |
|          | 10md+ExtFP    | 0.624±0.031 | 0.566±0.027 | 0.587±0.019 | 0.193±0.041 | 0.595±0.021 |
|          | CC+MACCS      | 0.607±0.043 | 0.587±0.029 | 0.592±0.018 | 0.194±0.032 | 0.597±0.016 |
|          | CC+CDK        | 0.596±0.025 | 0.603±0.026 | 0.596±0.014 | 0.199±0.027 | 0.599±0.013 |
|          | CC+PubChem    | 0.615±0.024 | 0.558±0.034 | 0.577±0.015 | 0.173±0.039 | 0.587±0.020 |
|          | CC+KRFP       | 0.600±0.025 | 0.602±0.035 | 0.598±0.009 | 0.203±0.022 | 0.601±0.011 |
| RF       | CC+AP2D       | 0.580±0.046 | 0.572±0.046 | 0.570±0.010 | 0.152±0.023 | 0.576±0.011 |
|          | CC+ExtFP      | 0.604±0.029 | 0.587±0.023 | 0.589±0.009 | 0.192±0.020 | 0.595±0.009 |
|          | RDKit+MACCS   | 0.544±0.019 | 0.639±0.028 | 0.583±0.015 | 0.186±0.030 | 0.591±0.015 |
|          | RDKit+CDK     | 0.565±0.024 | 0.632±0.032 | 0.593±0.018 | 0.199±0.030 | 0.599±0.015 |
|          | RDKit+PubChem | 0.530±0.019 | 0.635±0.032 | 0.576±0.021 | 0.168±0.043 | 0.583±0.020 |
|          | RDKit+KRFP    | 0.565±0.044 | 0.628±0.045 | 0.587±0.025 | 0.196±0.044 | 0.596±0.022 |
|          | RDKit+AP2D    | 0.565±0.025 | 0.613±0.029 | 0.579±0.018 | 0.180±0.018 | 0.589±0.017 |
|          | RDKit+ExtFP   | 0.536±0.043 | 0.648±0.031 | 0.583±0.015 | 0.188±0.031 | 0.592±0.015 |
|          | 10md+MACCS    | 0.567±0.019 | 0.596±0.033 | 0.576±0.025 | 0.164±0.043 | 0.582±0.021 |
|          | 10md+CDK      | 0.522±0.037 | 0.686±0.031 | 0.591±0.015 | 0.213±0.032 | 0.604±0.016 |
|          | 10md+PubChem  | 0.537±0.035 | 0.604±0.035 | 0.563±0.017 | 0.143±0.038 | 0.570±0.019 |
|          | 10md+KRFP     | 0.609±0.022 | 0.588±0.024 | 0.592±0.014 | 0.198±0.025 | 0.598±0.012 |
|          | 10md+AP2D     | 0.585±0.038 | 0.618±0.044 | 0.594±0.013 | 0.203±0.023 | 0.601±0.011 |

|         |               |             |             |             |             |             |
|---------|---------------|-------------|-------------|-------------|-------------|-------------|
| XGBoost | 10md+ExtFP    | 0.545±0.029 | 0.656±0.036 | 0.590±0.018 | 0.204±0.028 | 0.600±0.013 |
|         | CC+MACCS      | 0.611±0.018 | 0.592±0.036 | 0.601±0.019 | 0.206±0.034 | 0.601±0.017 |
|         | CC+CDK        | 0.554±0.033 | 0.655±0.028 | 0.596±0.009 | 0.210±0.015 | 0.604±0.007 |
|         | CC+PubChem    | 0.650±0.019 | 0.557±0.028 | 0.598±0.015 | 0.210±0.032 | 0.603±0.016 |
|         | CC+KRFP       | 0.558±0.038 | 0.642±0.029 | 0.584±0.018 | 0.210±0.022 | 0.601±0.011 |
|         | CC+AP2D       | 0.599±0.032 | 0.602±0.030 | 0.597±0.011 | 0.204±0.025 | 0.601±0.013 |
|         | CC+ExtFP      | 0.585±0.029 | 0.621±0.046 | 0.594±0.021 | 0.208±0.040 | 0.603±0.020 |
|         | RDKit+MACCS   | 0.586±0.022 | 0.603±0.044 | 0.590±0.023 | 0.189±0.038 | 0.595±0.019 |
|         | RDKit+CDK     | 0.588±0.017 | 0.609±0.028 | 0.593±0.017 | 0.199±0.036 | 0.598±0.018 |
|         | RDKit+PubChem | 0.597±0.031 | 0.600±0.026 | 0.592±0.009 | 0.196±0.021 | 0.598±0.011 |
|         | RDKit+KRFP    | 0.606±0.036 | 0.574±0.037 | 0.588±0.013 | 0.181±0.026 | 0.590±0.013 |
|         | RDKit+AP2D    | 0.585±0.037 | 0.597±0.029 | 0.588±0.014 | 0.182±0.024 | 0.591±0.013 |
|         | RDKit+ExtFP   | 0.562±0.018 | 0.600±0.020 | 0.579±0.012 | 0.163±0.025 | 0.581±0.012 |
|         | 10md+MACCS    | 0.562±0.021 | 0.628±0.021 | 0.587±0.020 | 0.192±0.034 | 0.595±0.017 |
|         | 10md+CDK      | 0.602±0.034 | 0.605±0.038 | 0.598±0.021 | 0.206±0.045 | 0.603±0.022 |
|         | 10md+PubChem  | 0.580±0.032 | 0.609±0.025 | 0.590±0.010 | 0.191±0.021 | 0.595±0.011 |
|         | 10md+KRFP     | 0.593±0.036 | 0.600±0.037 | 0.592±0.020 | 0.193±0.031 | 0.596±0.014 |
|         | 10md+AP2D     | 0.581±0.041 | 0.623±0.033 | 0.593±0.021 | 0.206±0.035 | 0.602±0.018 |
|         | 10md+ExtFP    | 0.546±0.023 | 0.618±0.043 | 0.576±0.021 | 0.166±0.042 | 0.582±0.021 |
|         | CC+MACCS      | 0.642±0.027 | 0.583±0.021 | 0.607±0.008 | 0.226±0.023 | 0.613±0.011 |
|         | CC+CDK        | 0.594±0.024 | 0.609±0.024 | 0.603±0.014 | 0.204±0.027 | 0.602±0.013 |
|         | CC+PubChem    | 0.610±0.011 | 0.615±0.021 | 0.608±0.009 | 0.226±0.021 | 0.612±0.010 |
|         | CC+KRFP       | 0.619±0.027 | 0.614±0.033 | 0.611±0.012 | 0.233±0.025 | 0.617±0.010 |
|         | CC+AP2D       | 0.603±0.026 | 0.603±0.027 | 0.600±0.011 | 0.207±0.020 | 0.603±0.010 |
|         | CC+ExtFP      | 0.594±0.039 | 0.608±0.034 | 0.596±0.021 | 0.203±0.046 | 0.601±0.021 |
| ANN     | RDKit+MACCS   | 0.550±0.038 | 0.553±0.029 | 0.540±0.013 | 0.105±0.027 | 0.551±0.013 |
|         | RDKit+CDK     | 0.621±0.027 | 0.569±0.023 | 0.589±0.021 | 0.192±0.038 | 0.595±0.018 |
|         | RDKit+PubChem | 0.577±0.037 | 0.518±0.024 | 0.545±0.008 | 0.096±0.020 | 0.548±0.010 |
|         | RDKit+KRFP    | 0.584±0.019 | 0.539±0.037 | 0.553±0.019 | 0.125±0.036 | 0.562±0.018 |

|              |             |             |             |             |             |
|--------------|-------------|-------------|-------------|-------------|-------------|
| RDKit+AP2D   | 0.566±0.048 | 0.551±0.032 | 0.549±0.020 | 0.120±0.039 | 0.559±0.019 |
| RDKit+ExtFP  | 0.654±0.028 | 0.539±0.017 | 0.591±0.022 | 0.195±0.038 | 0.597±0.019 |
| 10md+MACCS   | 0.557±0.045 | 0.477±0.046 | 0.506±0.032 | 0.035±0.029 | 0.517±0.014 |
| 10md+CDK     | 0.625±0.036 | 0.554±0.045 | 0.579±0.012 | 0.179±0.023 | 0.589±0.012 |
| 10md+PubChem | 0.572±0.042 | 0.540±0.016 | 0.549±0.023 | 0.113±0.046 | 0.556±0.022 |
| 10md+KRFP    | 0.552±0.032 | 0.608±0.038 | 0.569±0.009 | 0.163±0.022 | 0.580±0.010 |
| 10md+AP2D    | 0.565±0.038 | 0.505±0.024 | 0.523±0.028 | 0.072±0.032 | 0.535±0.017 |
| 10md+ExtFP   | 0.622±0.045 | 0.567±0.048 | 0.589±0.011 | 0.190±0.026 | 0.595±0.013 |
| CC+MACCS     | 0.546±0.026 | 0.541±0.040 | 0.533±0.022 | 0.087±0.043 | 0.543±0.021 |
| CC+CDK       | 0.634±0.015 | 0.552±0.018 | 0.590±0.008 | 0.187±0.012 | 0.593±0.006 |
| CC+PubChem   | 0.537±0.042 | 0.570±0.024 | 0.542±0.017 | 0.107±0.032 | 0.553±0.016 |
| CC+KRFP      | 0.585±0.031 | 0.595±0.021 | 0.577±0.022 | 0.182±0.028 | 0.590±0.013 |
| CC+AP2D      | 0.520±0.022 | 0.580±0.038 | 0.534±0.022 | 0.101±0.040 | 0.550±0.020 |
| CC+ExtFP     | 0.633±0.031 | 0.551±0.042 | 0.585±0.020 | 0.185±0.034 | 0.592±0.017 |

---

**Table S5.** Prediction results of RDMD+PubChem-k-NN and CCMD+KPFP-XGBoost models for external validation dataset.

| Name          | True label | Model prediction  |                   |
|---------------|------------|-------------------|-------------------|
|               |            | RDMD+PubChem-k-NN | CCMD+KPFP-XGBoost |
| AMIODARONE    | 1          | 0                 | 0                 |
| ATENOLOL      | 1          | 1                 | 0                 |
| ATOVAQUONE    | 0          | 0                 | 0                 |
| AZITHROMYCIN  | 0          | 0                 | 0                 |
| AZTREONAM     | 1          | 1                 | 1                 |
| BENAZEPRIL    | 0          | 0                 | 0                 |
| BUDESONIDE    | 0          | 1                 | 1                 |
| BUMETANIDE    | 1          | 1                 | 1                 |
| CEFAZOLIN     | 1          | 1                 | 1                 |
| CEFTAZIDIME   | 1          | 1                 | 1                 |
| CILASTATIN    | 0          | 0                 | 0                 |
| CLONAZEPAM    | 0          | 0                 | 0                 |
| DICLOFENAC    | 0          | 1                 | 1                 |
| FINASTERIDE   | 0          | 0                 | 0                 |
| FLUVASTATIN   | 0          | 0                 | 0                 |
| GENTAMICIN    | 0          | 0                 | 0                 |
| GLIPIZIDE     | 0          | 0                 | 0                 |
| HALOPERIDOL   | 1          | 1                 | 0                 |
| HYDROMORPHONE | 0          | 0                 | 0                 |
| IBUPROFEN     | 1          | 1                 | 0                 |
| IPRATROPIUM   | 0          | 0                 | 0                 |
| LEVETIRACETAM | 0          | 1                 | 0                 |
| LISINOPRIL    | 1          | 0                 | 0                 |
| LORACARBEF    | 1          | 1                 | 1                 |
| MELOXICAM     | 0          | 0                 | 0                 |
| METHYLDOPA    | 0          | 0                 | 0                 |

|                    |   |   |   |
|--------------------|---|---|---|
| METHYLPREDNISOLONE | 1 | 1 | 1 |
| METOLAZONE         | 0 | 0 | 1 |
| MORPHINE           | 0 | 1 | 0 |
| NEFAZODONE         | 0 | 1 | 0 |
| OXCARBAZEPINE      | 1 | 1 | 1 |
| PANTOPRAZOLE       | 1 | 1 | 0 |
| PHENYTOIN          | 1 | 1 | 1 |
| PRAVASTATIN        | 0 | 0 | 0 |
| PREDNISONE         | 0 | 1 | 1 |
| PROCAINAMIDE       | 1 | 1 | 1 |
| PROPOXYPHENE       | 1 | 1 | 1 |
| QUINIDINE          | 1 | 1 | 1 |
| RISEDRONIC ACID    | 0 | 0 | 0 |
| TERAZOSIN          | 0 | 1 | 0 |
| TRAMADOL           | 0 | 1 | 0 |
| VALSARTAN          | 0 | 0 | 0 |
| VANCOMYCIN         | 1 | 0 | 1 |
| VENLAFAXINE        | 0 | 0 | 0 |
| ZOLPIDEM           | 0 | 0 | 0 |

---

**Table S6.** The comparison results of the PubChem fingerprint between Levetiracetam and its corresponding tautomeric form.

| Structures<br><br>Bits | 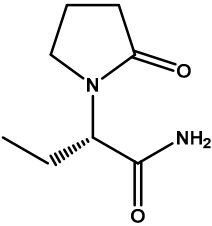 |  |
|------------------------|-----------------------------------------------------------------------------------|-------------------------------------------------------------------------------------|
|                        |                                                                                   | (Tautomeric form)                                                                   |
| 145                    | 1                                                                                 | 0                                                                                   |
| 146                    | 1                                                                                 | 0                                                                                   |
| 148                    | 0                                                                                 | 1                                                                                   |
| 149                    | 0                                                                                 | 1                                                                                   |
| 308                    | 0                                                                                 | 1                                                                                   |
| 406                    | 0                                                                                 | 1                                                                                   |
| 415                    | 0                                                                                 | 1                                                                                   |
| 434                    | 0                                                                                 | 1                                                                                   |
| 441                    | 0                                                                                 | 1                                                                                   |
| 446                    | 0                                                                                 | 1                                                                                   |
| 449                    | 0                                                                                 | 1                                                                                   |
| 490                    | 0                                                                                 | 1                                                                                   |
| 498                    | 0                                                                                 | 1                                                                                   |
| 502                    | 0                                                                                 | 1                                                                                   |
| 556                    | 0                                                                                 | 1                                                                                   |
| 645                    | 1                                                                                 | 0                                                                                   |
| 646                    | 1                                                                                 | 0                                                                                   |
| 685                    | 1                                                                                 | 0                                                                                   |

**Table S7.** The comparison results of the RDKit descriptors between Levetiracetam and its corresponding tautomeric form and protonation state.

| Structures<br>Descriptors | 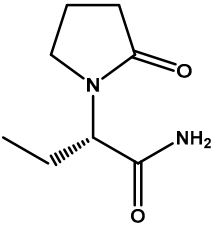 |  |
|---------------------------|-----------------------------------------------------------------------------------|-------------------------------------------------------------------------------------|
|                           |                                                                                   | (Tautomeric form)                                                                   |
| MaxEStateIndex            | 11.197                                                                            | 10.905                                                                              |
| MinEStateIndex            | -0.396                                                                            | -0.376                                                                              |
| MinAbsEStateIndex         | 0.056                                                                             | 0.181                                                                               |
| qed                       | 0.641                                                                             | 0.642                                                                               |
| FpDensityMorgan1          | 1.750                                                                             | 1.917                                                                               |
| FpDensityMorgan3          | 2.750                                                                             | 2.917                                                                               |
| BalabanJ                  | 2.647                                                                             | 2.664                                                                               |
| BertzCT                   | 203.235                                                                           | 213.103                                                                             |
| Chi1n                     | 4.253                                                                             | 4.115                                                                               |
| Chi3v                     | 2.201                                                                             | 2.083                                                                               |
| Chi4n                     | 1.574                                                                             | 1.455                                                                               |
| HallKierAlpha             | -1.060                                                                            | -1.190                                                                              |
| Kappa3                    | 1.571                                                                             | 1.519                                                                               |
| PEOE_VSA1                 | 10.634                                                                            | 15.740                                                                              |
| PEOE_VSA11                | 0.000                                                                             | 5.883                                                                               |
| PEOE_VSA12                | 11.814                                                                            | 5.907                                                                               |
| PEOE_VSA2                 | 9.589                                                                             | 4.795                                                                               |
| PEOE_VSA7                 | 12.842                                                                            | 18.918                                                                              |
| PEOE_VSA8                 | 12.966                                                                            | 6.545                                                                               |
| SMR_VSA1                  | 9.589                                                                             | 9.901                                                                               |
| SMR_VSA10                 | 11.814                                                                            | 5.907                                                                               |
| SMR_VSA5                  | 32.228                                                                            | 25.807                                                                              |



|                          |                                                                                     |                                                                                       |
|--------------------------|-------------------------------------------------------------------------------------|---------------------------------------------------------------------------------------|
| SMR_VSA7                 | 0.000                                                                               | 11.959                                                                                |
| SlogP_VSA2               | 29.301                                                                              | 28.500                                                                                |
| SlogP_VSA3               | 9.589                                                                               | 4.795                                                                                 |
| SlogP_VSA5               | 26.186                                                                              | 19.765                                                                                |
| TPSA                     | 63.400                                                                              | 66.560                                                                                |
| EState_VSA1              | 5.907                                                                               | 0.000                                                                                 |
| EState_VSA2              | 11.949                                                                              | 17.832                                                                                |
| EState_VSA3              | 19.386                                                                              | 12.966                                                                                |
| EState_VSA6              | 4.900                                                                               | 10.976                                                                                |
| VSA_EState9              | 32.667                                                                              | 32.167                                                                                |
| FractionCSP3             | 0.750                                                                               | 0.625                                                                                 |
| NHOHCount                | 2                                                                                   | 3                                                                                     |
| NumHAcceptors            | 2                                                                                   | 3                                                                                     |
| NumSaturatedHeterocycles | 1                                                                                   | 0                                                                                     |
| NumSaturatedRings        | 1                                                                                   | 0                                                                                     |
| MolLogP                  | -0.127                                                                              | 0.355                                                                                 |
| fr_C_O                   | 2                                                                                   | 1                                                                                     |
| fr_Ndealkylation2        | 1                                                                                   | 0                                                                                     |
| fr_amide                 | 2                                                                                   | 1                                                                                     |
| <b>Structures</b>        | 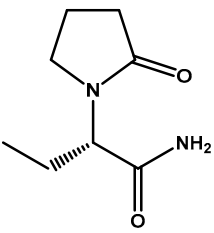 |  |
| <b>Descriptors</b>       | <b>(Protonation state)</b>                                                          |                                                                                       |
| MaxEStateIndex           | 11.197                                                                              | 11.225                                                                                |
| MinEStateIndex           | -0.396                                                                              | -0.278                                                                                |
| MinAbsEStateIndex        | 0.056                                                                               | 0.096                                                                                 |
| qed                      | 0.641                                                                               | 0.601                                                                                 |
| MolWt                    | 170.212                                                                             | 171.220                                                                               |

|               |        |        |
|---------------|--------|--------|
| Chi1n         | 4.253  | 4.317  |
| Chi3v         | 2.201  | 2.245  |
| Chi4n         | 1.574  | 1.620  |
| HallKierAlpha | -1.060 | -0.900 |
| Kappa3        | 1.571  | 1.637  |
| PEOE_VSA1     | 10.634 | 4.900  |
| PEOE_VSA12    | 11.814 | 5.907  |
| PEOE_VSA14    | 0.000  | 5.907  |
| PEOE_VSA2     | 9.589  | 10.528 |
| PEOE_VSA3     | 0.000  | 4.795  |
| SMR_VSA1      | 9.589  | 15.323 |
| SMR_VSA4      | 5.734  | 0.000  |
| TPSA          | 63.400 | 65.020 |
| EState_VSA1   | 5.907  | 0.000  |
| EState_VSA2   | 11.949 | 17.856 |
| EState_VSA3   | 19.386 | 12.842 |
| EState_VSA4   | 6.421  | 12.966 |
| EState_VSA8   | 0.000  | 5.734  |
| EState_VSA9   | 5.734  | 0.000  |
| VSA_EState9   | 32.667 | 31.667 |
| NHOHCount     | 2      | 3      |
| MolLogP       | -0.127 | -0.844 |
| fr_priamide   | 1      | 0      |
| fr_quatN      | 0      | 1      |
